# Supplementary material for: Liubao tea extract ameliorates ovalbumin-induced allergic asthma by regulating gut microbiota in mice
Source: Royal Society of Chemistry journal article supplement (doi:10.1039/d3fo03470d), 2023-01-01
Supplement: d3fo03470d2.pdf [file d3fo03470d2.pdf]

### Supplementary Materials

**Table S1** Primer sequences of qRT-PCR (5'-3').

---

|                   |             |                        |
|-------------------|-------------|------------------------|
| <i>β-actin</i>    | F(Forward): | CTACCTCATGAAGATCCTGACC |
|                   | R(Reverse): | CACAGCTTCTCTTIGATGTCAC |
| <i>Ym-1</i>       | F:          | TGGAATTGGTGCCCTACAA    |
|                   | R:          | GCATAGGGTACTTCCTGGGG   |
| <i>Arginase-1</i> | F:          | ACATTGGCTTGCGAGACGTA   |
|                   | R:          | ATCACCTTGCCAATCCCCAG   |
| <i>Fizz-1</i>     | F:          | GGGATGACTGCTACTGGGTG   |
|                   | R:          | TCAACGAGTAAGCACAGGCA   |
| <i>Eotaxin</i>    | F:          | CTGCTCACGGTCACTTCCTT   |
|                   | R:          | GGGGTCAGCACAGATCTCTT   |
| <i>α-SMA</i>      | F:          | CCCAACTGGGACCACATGG    |
|                   | R:          | TACATGCGGGGGACATTGAAG  |

---

**Table S2** Parameter results of RDA/CCA analysis.

|               | RDA1    | RDA2    | r <sup>2</sup> | <i>p</i> value |
|---------------|---------|---------|----------------|----------------|
| IgE           | 0.9096  | 0.4154  | 0.4356         | 0.027          |
| OVA-sIgE      | 0.9996  | -0.0286 | 0.6089         | 0.004          |
| IL-4          | 0.9768  | 0.2143  | 0.5798         | 0.007          |
| IL-5          | 0.9941  | 0.1083  | 0.5973         | 0.006          |
| IL-13         | 0.9988  | -0.0482 | 0.436          | 0.028          |
| IFN- $\gamma$ | -0.9939 | -0.1103 | 0.7498         | 0.001          |
| Eotaxin       | 0.9857  | -0.1684 | 0.5073         | 0.017          |
| MCP-1         | 0.9892  | -0.1463 | 0.5725         | 0.007          |

RDA column indicates the correlation between environmental factors and sorting axis; r<sup>2</sup> represents the determining coefficient between environmental factors and species distribution (ranges from 0 to 1); *p* value represents the significance test value of correlation, and  $p < 0.05$  indicates that there is significant correlation.

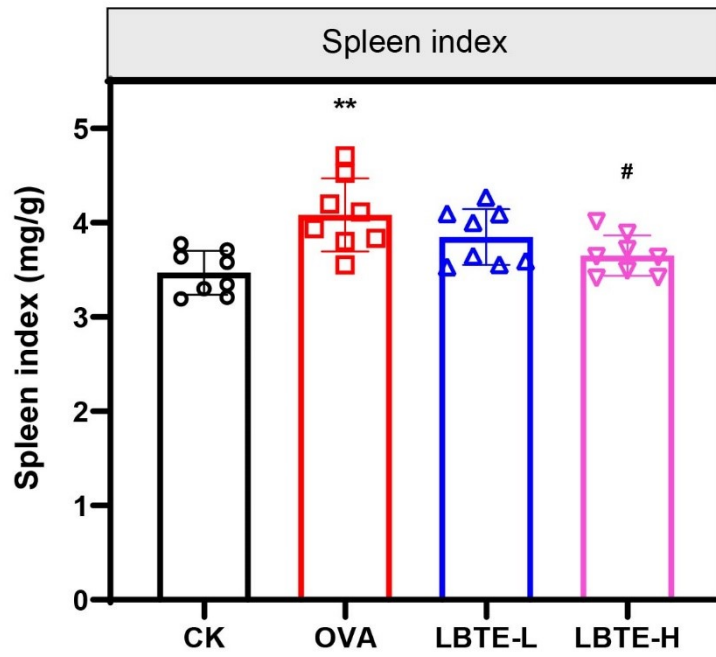

**Fig. S1.** The spleen Index,  $n = 8$ . The data are shown as mean  $\pm$  SEM. (\*  $p < 0.05$ , \*\*  $p < 0.01$  vs CK group; #  $p < 0.05$ , ##  $p < 0.01$  vs OVA group).

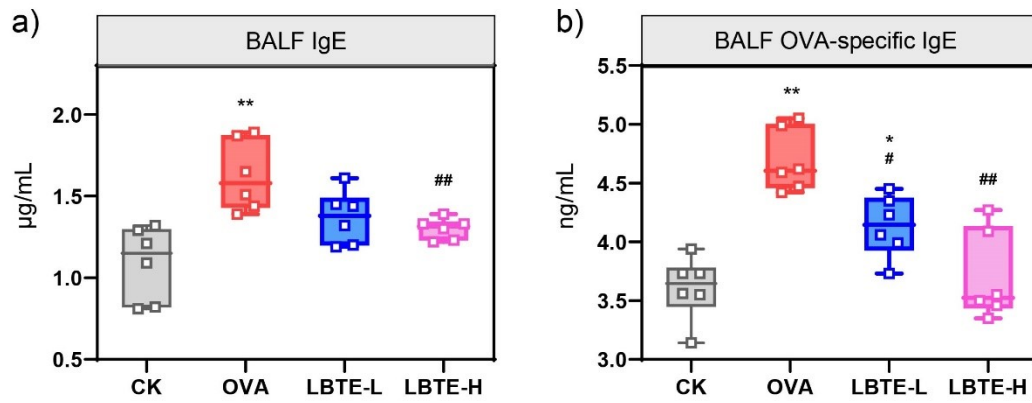

**Fig. S2.** Levels of IgE (a) and OVA-specific IgE (b) in BALF detected by ELISA,  $n = 6$ . The data are shown as mean  $\pm$  SEM. (\*  $p < 0.05$ , \*\*  $p < 0.01$  vs CK group; #  $p < 0.05$ , ##  $p < 0.01$  vs OVA group).

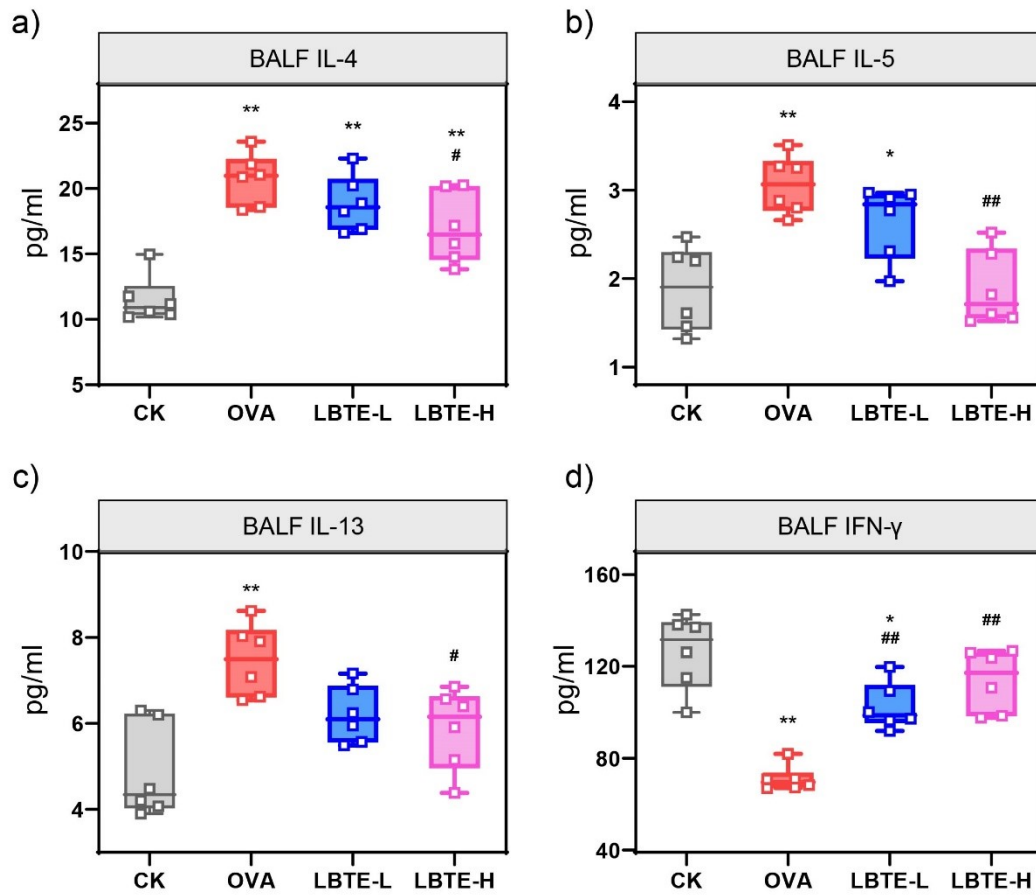

**Fig. S3.** Levels of inflammatory cytokines in BALF detected by ELISA,  $n = 6$ . (a) IL-4, (b) IL-5, (c) IL-13 and (d) IFN- $\gamma$ . The data are shown as mean  $\pm$  SEM. (\*  $p < 0.05$ , \*\*  $p < 0.01$  vs CK group; #  $p < 0.05$ , ##  $p < 0.01$  vs OVA group).

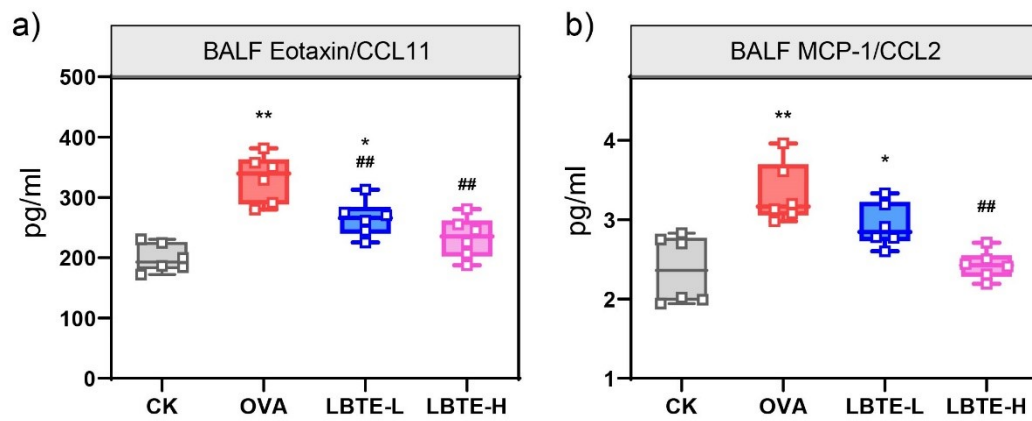

**Fig. S4.** Levels of inflammatory chemokines in BALF detected by ELISA,  $n = 6$ . (a) Eotaxin and (b) MCP-1. The data are shown as mean  $\pm$  SEM. (\*  $p < 0.05$ , \*\*  $p < 0.01$  vs CK group; #  $p < 0.05$ , ##  $p < 0.01$  vs OVA group).

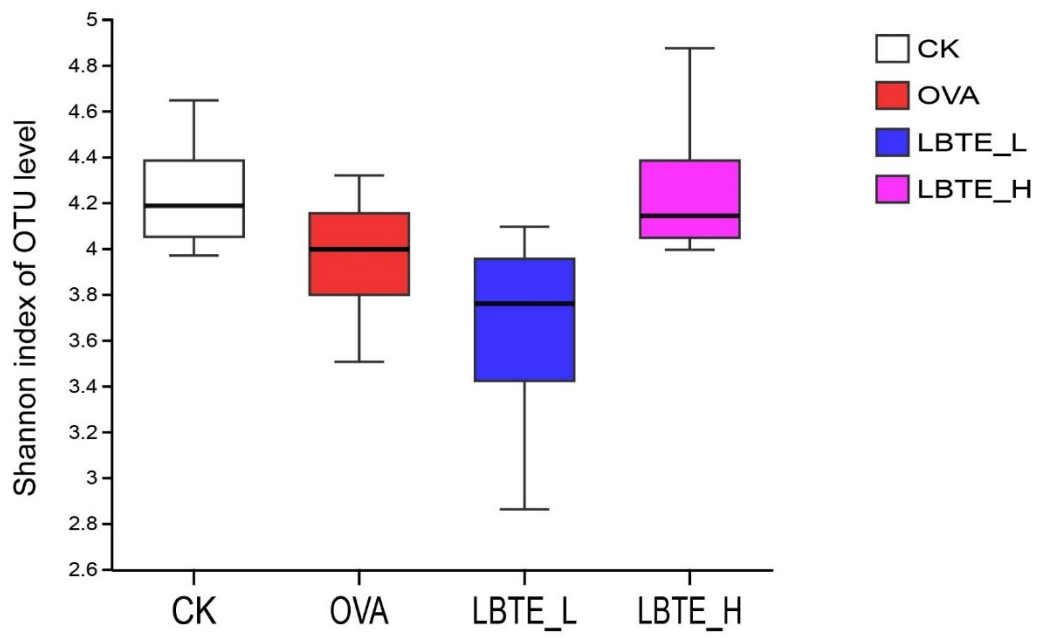

**Fig. S5.** Shannon index of  $\alpha$ -diversity of gut microbiota,  $n = 4$ .

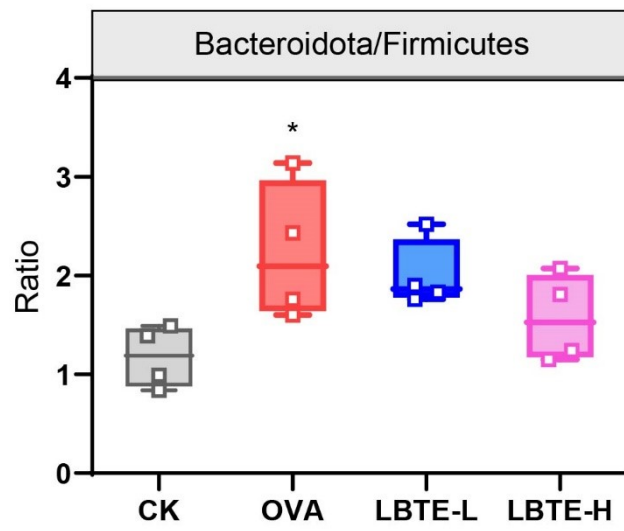

**Fig. S6.** Bacteroidota/Firmicutes ratio in mice faces,  $n = 4$ . (\*  $p < 0.05$ )



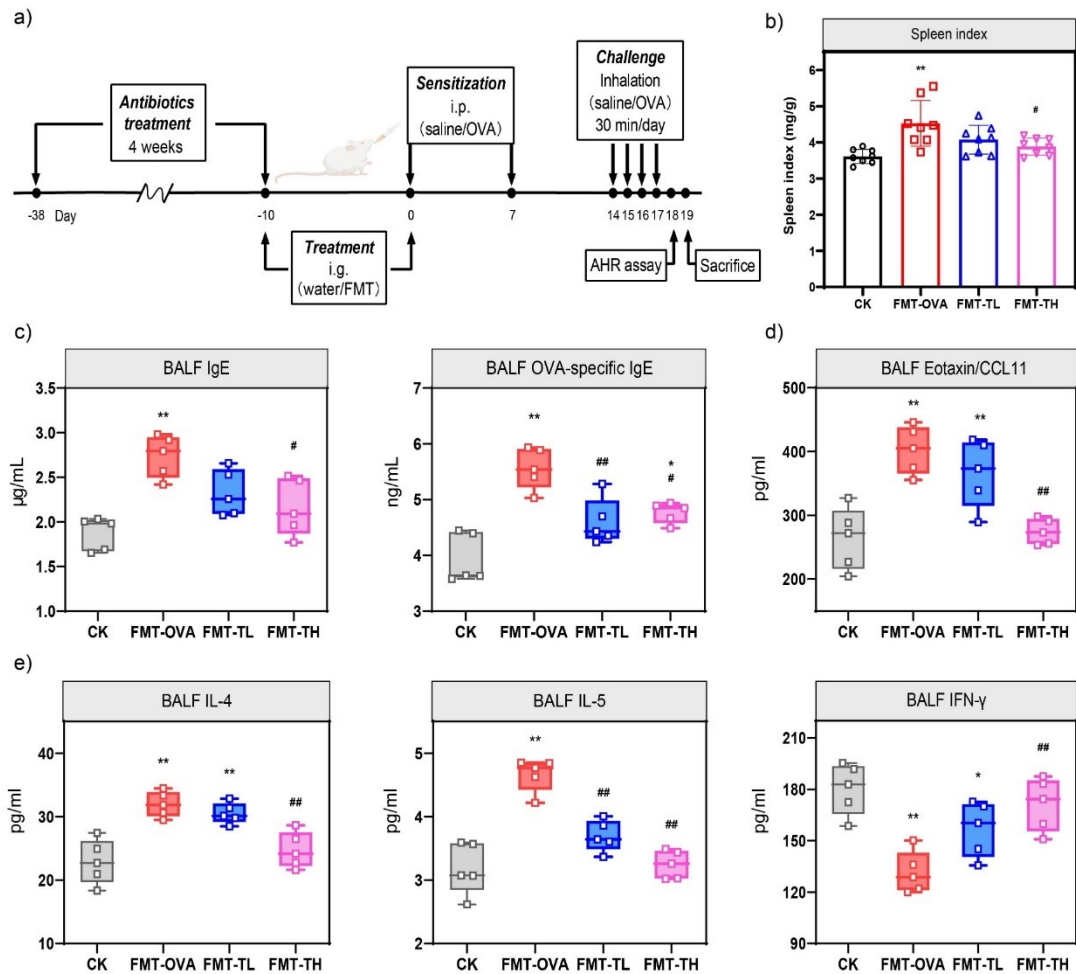

**Fig. S7.** (a) Schematic representation of the mice FMT experiment of LBTE protective effect against OVA-induced asthma. (b) The spleen Index,  $n = 8$ . (c) Levels of IgE and OVA-specific IgE in BALF detected by ELISA,  $n = 5$ . (d) Levels of Eotaxin in BALF detected by ELISA,  $n = 5$ . (e) Levels of IL-4, IL-5 and IFN- $\gamma$  in BALF detected by ELISA,  $n = 5$ . The data are shown as mean  $\pm$  SEM. (\*  $p < 0.05$ , \*\*  $p < 0.01$  vs CK group; #  $p < 0.05$ , ##  $p < 0.01$  vs OVA group).
